# Supplementary material for: Tissue-specific reprogramming of host tRNA transcriptome by the microbiome
Source: HighWire-hosted journal article supplement (doi:10.1101/gr.272153.120), 2021-04-15
Supplement: Supplemental_Materials.pdf [file Supplemental_Materials.pdf]

## **Supplemental Materials:**

### **Tissue-specific reprogramming of host tRNA transcriptome by the microbiome**

**Jia Huang,<sup>1,†</sup> Wenjun Chen,<sup>2,†</sup> Fan Zhou,<sup>1</sup> Zhichang Pang,<sup>1</sup> Luoluo Wang,<sup>1</sup>  
Tao Pan,<sup>3</sup> and Xiaoyun Wang<sup>1,\*</sup>**

*<sup>1</sup>Guangdong Provincial Key Laboratory of Insect Developmental Biology and Applied Technology, Institute of Insect Science and Technology, School of Life Sciences, South China Normal University, Guangzhou 510631, China; <sup>2</sup>Department of Molecular Genetics and Cell Biology, The University of Chicago, Chicago, IL 60637, USA; <sup>3</sup>Department of Biochemistry and Molecular Biology, The University of Chicago, Chicago, IL 60637, USA*

**<sup>†</sup>These authors contributed equally to this work.**

**\*Corresponding author: wangxy@scnu.edu.cn**

## Contents:

**Pages 3: Supplemental Tables S1.** Sequencing read counts and mapping results of this study.

**Pages 5: Supplemental Figure S1.** Supplemental data for the principal component analyses (PCAs) of the cytosolic (Fig. 2A) and mitochondrial tRNAs (Fig. 2B), respectively.

**Page 6: Supplemental Figure S2.** Sample correlation analyses of the tRNA expression.

**Page 7: Supplemental Figure S3.** Volcano plot for the kidneys at the tRNA isodecoder level.

**Page 8: Supplemental Figure S4.** tRNA co-expression correlation plots at the amino acid isotype level.

**Page 9: Supplemental Figure S5.** Mapping alignments of two cytosolic amino acid isotypes (tRNA<sup>His</sup> and tRNA<sup>Phe</sup>) in the brains.

**Page 10: Supplemental Figure S6.** Mapping alignments of two mitochondrial isoacceptors (tRNA<sup>Leu-UAG</sup> and tRNA<sup>Phe</sup>) in the brains.

**Page 11: Supplemental Figure S7.** Correlation plot between the mammalian anticodons and codons.

**Table S1.** Sequencing read counts and mapping results of this study. B: brain; I: intestine; K: kidney; L: liver; SPF: specific pathogen-free; GF: germ-free; –DM: non-demethylase-treated (untreated, UT); +DM: demethylase-treated.

| Sample     | Tissue    | Mouse | Treatment | Replicate No. | Index sequence | Total reads | Mapped tRNA reads |               | Mapped tRNA molecules |               |
|------------|-----------|-------|-----------|---------------|----------------|-------------|-------------------|---------------|-----------------------|---------------|
|            |           |       |           |               |                |             | Cytosolic         | Mitochondrial | Cytosolic             | Mitochondrial |
| B_SPF_UT_1 | Brain     | SPF   | –DM       | 1             | TACAAG         | 41,776,556  | 10,288,214        | 2,493,350     | 10,061,721            | 2,192,345     |
| B_SPF_UT_2 | Brain     | SPF   | –DM       | 2             | TTGACT         | 40,245,850  | 9,618,666         | 2,082,170     | 9,421,661             | 1,803,392     |
| B_SPF_UT_3 | Brain     | SPF   | –DM       | 3             | GGAAGT         | 45,487,286  | 9,828,949         | 2,393,392     | 9,566,131             | 1,950,487     |
| B_SPF_DM_1 | Brain     | SPF   | +DM       | 1             | CGTACG         | 28,690,654  | 4,515,183         | 368,684       | 4,391,993             | 438,202       |
| B_SPF_DM_2 | Brain     | SPF   | +DM       | 2             | CCACTC         | 30,895,820  | 4,999,269         | 414,130       | 4,819,861             | 486,015       |
| B_SPF_DM_3 | Brain     | SPF   | +DM       | 3             | GCTACC         | 18,428,290  | 628,480           | 279,745       | 603,691               | 258,358       |
| B_GF_UT_1  | Brain     | GF    | –DM       | 1             | GATCTG         | 45,789,834  | 7,171,919         | 3,175,379     | 7,119,765             | 3,017,019     |
| B_GF_UT_2  | Brain     | GF    | –DM       | 2             | AAGCTA         | 56,495,774  | 10,427,943        | 6,722,929     | 10,280,203            | 6,237,586     |
| B_GF_UT_3  | Brain     | GF    | –DM       | 3             | GTAGCC         | 26,463,226  | 2,700,375         | 1,339,527     | 2,682,343             | 1,290,821     |
| B_GF_DM_1  | Brain     | GF    | +DM       | 1             | CTCTAC         | 38,436,276  | 9,797,868         | 2,354,362     | 9,169,156             | 2,222,744     |
| B_GF_DM_2  | Brain     | GF    | +DM       | 2             | GGCCAC         | 32,213,624  | 6,130,858         | 1,214,328     | 6,048,139             | 1,286,908     |
| B_GF_DM_3  | Brain     | GF    | +DM       | 3             | CGAAAC         | 24,513,364  | 5,780,616         | 875,133       | 5,636,868             | 914,144       |
| I_SPF_UT_1 | Intestine | SPF   | –DM       | 1             | CGTGAT         | 35,290,352  | 15,784,305        | 6,654,051     | 11,669,277            | 4,245,910     |
| I_SPF_UT_2 | Intestine | SPF   | –DM       | 2             | ACATCG         | 40,053,616  | 15,546,029        | 9,942,546     | 11,537,828            | 6,223,704     |
| I_SPF_UT_3 | Intestine | SPF   | –DM       | 3             | GCCTAA         | 13,803,180  | 3,120,132         | 1,662,684     | 2,447,626             | 1,034,974     |
| I_SPF_DM_1 | Intestine | SPF   | +DM       | 1             | GGACGG         | 4,063,776   | 198,778           | 102,387       | 194,896               | 98,055        |
| I_SPF_DM_2 | Intestine | SPF   | +DM       | 2             | GCGGAC         | 5,853,226   | 57,299            | 14,209        | 56,372                | 13,679        |
| I_SPF_DM_3 | Intestine | SPF   | +DM       | 3             | TTTCAC         | 21,972,878  | 411,494           | 146,222       | 402,414               | 142,019       |
| I_GF_UT_1  | Intestine | GF    | –DM       | 1             | TCAAGT         | 38,808,280  | 10,372,997        | 10,878,163    | 8,663,283             | 7,668,357     |
| I_GF_UT_2  | Intestine | GF    | –DM       | 2             | CTGATC         | 17,139,612  | 1,364,089         | 1,166,342     | 1,176,612             | 897,828       |
| I_GF_UT_3  | Intestine | GF    | –DM       | 3             | TGACAT         | 2,436,316   | 157,445           | 96,748        | 145,071               | 78,702        |
| I_GF_DM_1  | Intestine | GF    | +DM       | 1             | TGGTCA         | 31,261,850  | 8,238,700         | 1,948,200     | 8,138,896             | 1,970,474     |
| I_GF_DM_2  | Intestine | GF    | +DM       | 2             | CACTGT         | 22,475,862  | 6,115,784         | 1,032,464     | 6,063,262             | 1,034,103     |
| I_GF_DM_3  | Intestine | GF    | +DM       | 3             | ATTGTC         | 26,426,170  | 5,230,280         | 1,635,730     | 5,207,303             | 1,632,411     |
| K_SPF_UT_1 | Kidney    | SPF   | –DM       | 1             | TACAAG         | 26,945,166  | 6,269,173         | 2,062,844     | 6,215,392             | 1,928,002     |
| K_SPF_UT_2 | Kidney    | SPF   | –DM       | 2             | TTGACT         | 46,481,358  | 8,265,553         | 2,615,604     | 8,200,538             | 2,455,749     |
| K_SPF_UT_3 | Kidney    | SPF   | –DM       | 3             | GGAAGT         | 36,558,894  | 8,467,000         | 3,827,220     | 8,314,357             | 3,413,918     |
| K_SPF_DM_1 | Kidney    | SPF   | +DM       | 1             | CGTACG         | 21,368,410  | 1,916,927         | 1,149,365     | 1,866,821             | 1,067,150     |
| K_SPF_DM_2 | Kidney    | SPF   | +DM       | 2             | CCACTC         | 34,976,618  | 7,839,574         | 1,313,265     | 7,687,736             | 1,359,780     |
| K_SPF_DM_3 | Kidney    | SPF   | +DM       | 3             | GCTACC         | 35,467,018  | 8,338,385         | 1,157,392     | 8,235,346             | 1,242,683     |

|            |        |     |     |   |        |             |            |            |            |            |
|------------|--------|-----|-----|---|--------|-------------|------------|------------|------------|------------|
| K_GF_UT_1  | Kidney | GF  | -DM | 1 | GATCTG | 40,041,188  | 11,110,591 | 5,519,137  | 10,949,868 | 5,080,446  |
| K_GF_UT_2  | Kidney | GF  | -DM | 2 | AAGCTA | 45,459,158  | 12,220,255 | 4,812,856  | 12,159,498 | 4,637,940  |
| K_GF_UT_3  | Kidney | GF  | -DM | 3 | GTAGCC | 34,859,812  | 8,519,777  | 4,538,068  | 8,398,367  | 4,222,622  |
| K_GF_DM_1  | Kidney | GF  | +DM | 1 | CTCTAC | 32,110,612  | 8,610,315  | 1,416,894  | 8,315,714  | 766,797    |
| K_GF_DM_2  | Kidney | GF  | +DM | 2 | GGCCAC | 22,976,416  | 3,679,101  | 821,885    | 3,631,681  | 846,641    |
| K_GF_DM_3  | Kidney | GF  | +DM | 3 | CGAAAC | 17,795,592  | 4,253,423  | 443,397    | 4,221,607  | 489,822    |
| L_SPF_UT_1 | Liver  | SPF | -DM | 1 | TGGTCA | 18,550,428  | 2,443,125  | 3,512,336  | 2,229,020  | 3,175,596  |
| L_SPF_UT_2 | Liver  | SPF | -DM | 2 | CACTGT | 20,233,708  | 3,097,641  | 3,586,976  | 2,586,057  | 2,857,784  |
| L_SPF_UT_3 | Liver  | SPF | -DM | 3 | ATTGGC | 52,170,314  | 6,672,730  | 8,797,669  | 6,051,539  | 7,923,271  |
| L_SPF_DM_1 | Liver  | SPF | +DM | 1 | GGACGG | 2,494,822   | 17,711     | 9,164      | 17,248     | 8,550      |
| L_SPF_DM_2 | Liver  | SPF | +DM | 2 | GCGGAC | 3,983,208   | 121,175    | 37,051     | 117,283    | 34,789     |
| L_SPF_DM_3 | Liver  | SPF | +DM | 3 | TTTCAC | 1,836,760   | 161,817    | 37,006     | 159,760    | 37,608     |
| L_GF_UT_1  | Liver  | GF  | -DM | 1 | CGTGAT | 8,359,028   | 188,414    | 163,533    | 156,955    | 125,270    |
| L_GF_UT_2  | Liver  | GF  | -DM | 2 | ACATCG | 151,618,438 | 34,707,525 | 28,900,278 | 32,782,836 | 26,056,018 |
| L_GF_UT_3  | Liver  | GF  | -DM | 3 | GCCTAA | 3,145,434   | 345,026    | 377,362    | 337,981    | 363,434    |
| L_GF_DM_1  | Liver  | GF  | +DM | 1 | TCAAGT | 3,835,010   | 292,951    | 45,484     | 272,678    | 40,748     |
| L_GF_DM_2  | Liver  | GF  | +DM | 2 | CTGATC | 14,980,484  | 1,913,525  | 2,036,529  | 1,884,314  | 1,992,343  |
| L_GF_DM_3  | Liver  | GF  | +DM | 3 | TGACAT | 7,325,582   | 919,646    | 180,265    | 908,068    | 186,341    |

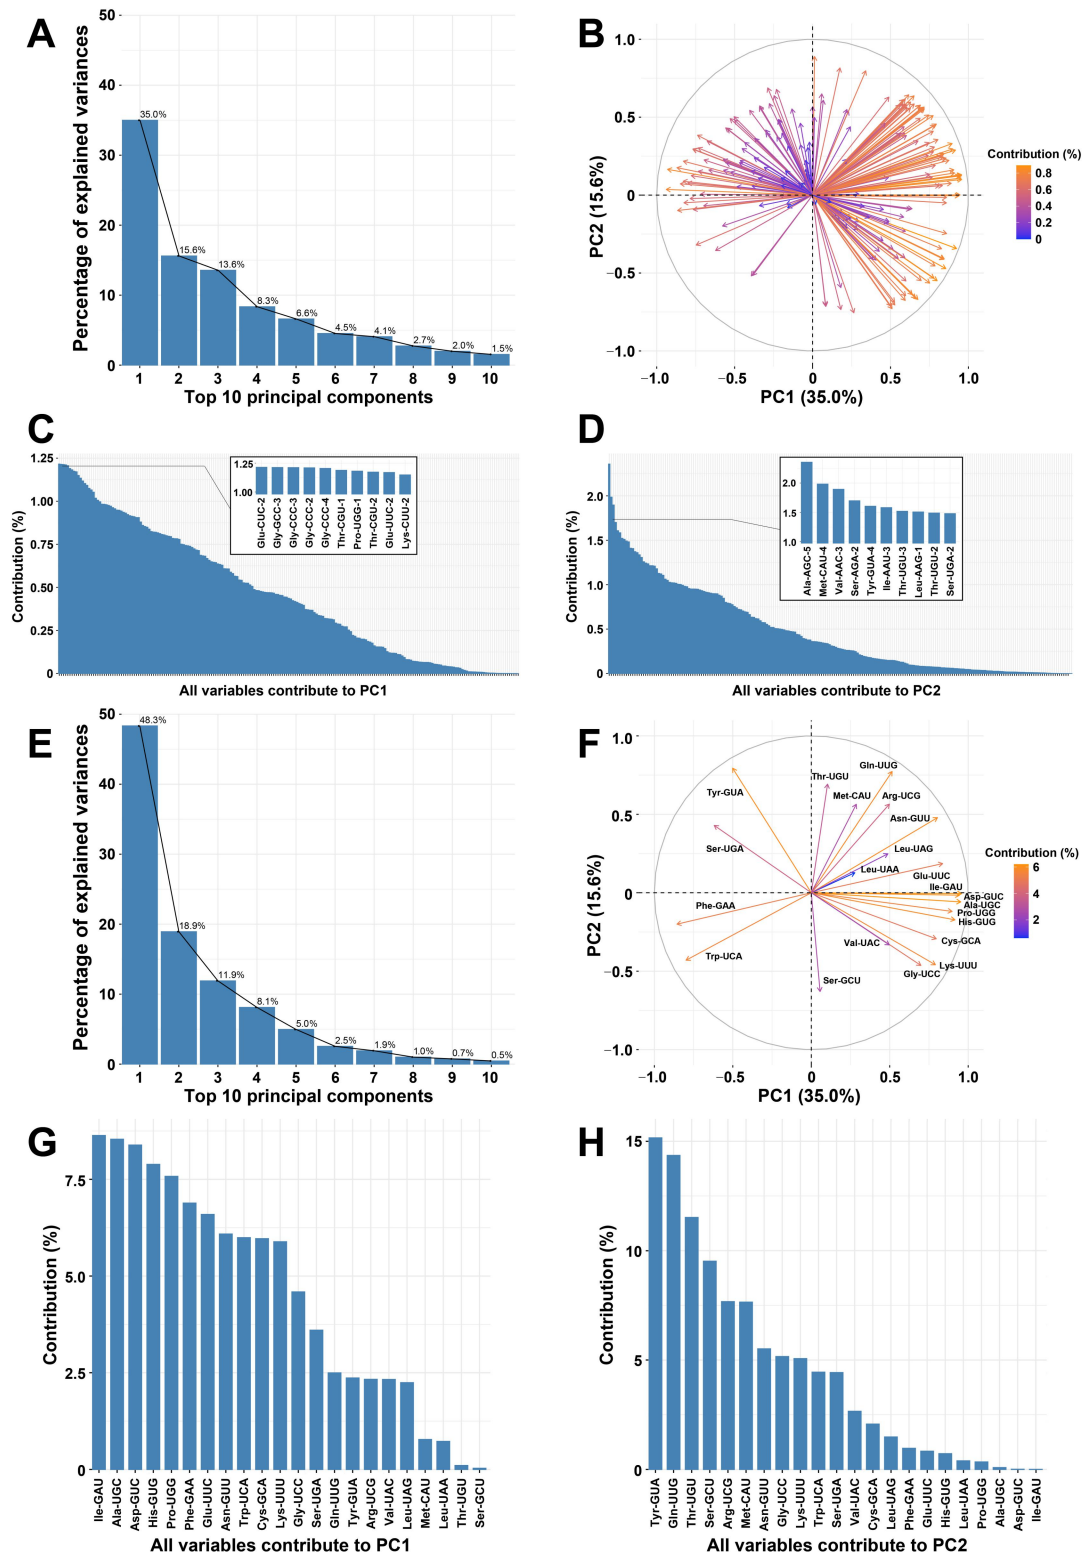

**Figure S1.** Supplemental data for the principal component analyses (PCAs) of the cytosolic (Fig. 2A) and mitochondrial tRNAs (Fig. 2B), respectively. (A) Top 10 PCs of Fig. 2A. (B) All the 216 cytosolic tRNA isodecoders contributed to the PC1 and

PC2 of Fig. 2A. (C) All the 216 cytosolic tRNA isodecoders and their contributions to the PC1 of Fig. 2A in descending order. (D) All the 216 cytosolic tRNA isodecoders and their contributions to the PC2 of Fig. 2A in descending order. (E) Top 10 PCs of Fig. 2B. (F) All the 22 mitochondrial tRNA isoacceptors contributed to the PC1 and PC2 of Fig. 2B. (G) All the 22 mitochondrial tRNA isoacceptors and their contributions to the PC1 of Fig. 2B in descending order. (H) All the 22 mitochondrial tRNA isoacceptors and their contributions to the PC2 of Fig. 2A in descending order.

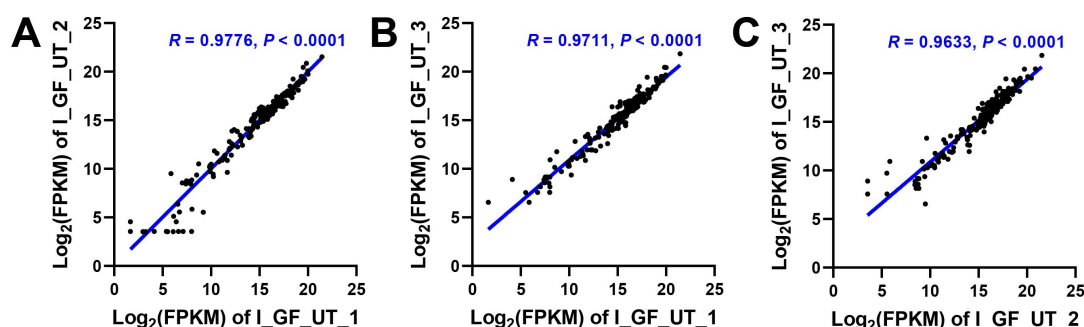

**Figure S2.** Sample correlation analyses of the tRNA expression. These analyses were based on the fragments per kilobase per million (FPKM) values of 216 cytosolic and 22 mitochondrial tRNAs from the three intestinal biological replicates of the GF mice. (A) I\_GF\_UT\_1 versus I\_GF\_UT\_2. (B) I\_GF\_UT\_1 versus I\_GF\_UT\_3. (C) I\_GF\_UT\_2 versus I\_GF\_UT\_3. Sample names follow those in the Supplemental Tables S1.

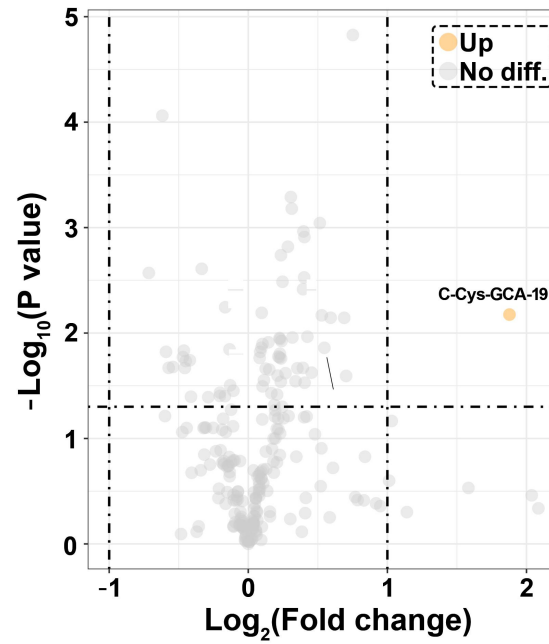

**Figure S3.** Volcano plot for the kidneys at the tRNA isodecoder level. This analysis was based on the tRNA expression of FPKM values of 216 cytosolic and 22 mitochondrial tRNAs from the kidneys ( $n = 3$ , SPF versus GF mice).  $P < 0.05$  and  $\log_2(\text{fold change}) > 1$  were set as the thresholds of significance, and the name of the significant cytosolic tRNA isodecoder follows the name in the Genomic tRNA Database (GtRNAdb, <http://gtrnadb.ucsc.edu/genomes/eukaryota/Mmusc10/>). C: cytosolic tRNA.

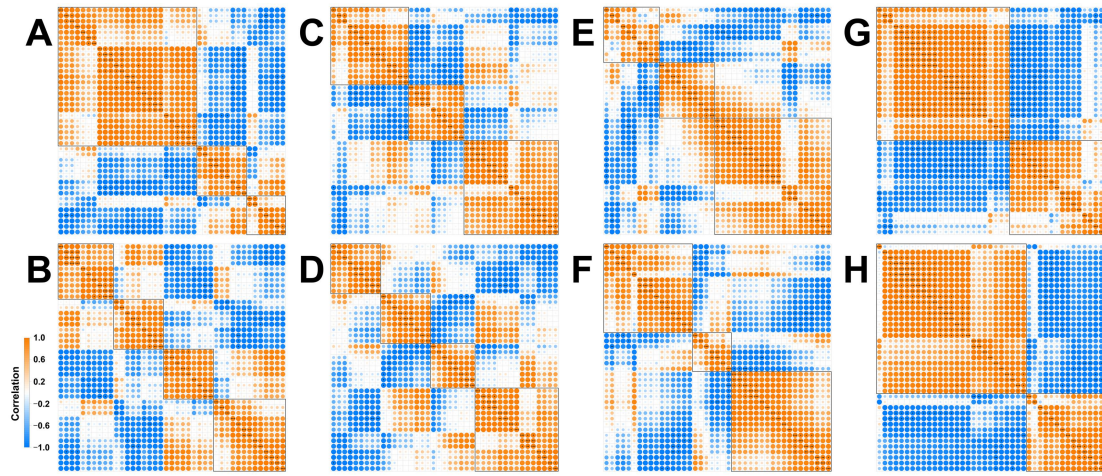

**Figure S4.** tRNA co-expression correlation plots at the amino acid isotype level. The analyses were based on the FPKM values of 21 cytosolic and 20 mitochondrial tRNA isotypes from four tissue types (brain, intestine, kidney, and liver;  $n = 3$  for both GF and SPF mice). (A) Brains of the GF mice. (B) Brains of the SPF mice. (C) Intestines of the GF mice. (D) Intestines of the SPF mice. (E) Kidneys of the GF mice. (F) Kidneys of the SPF mice. (G) Livers of the GF mice. (H) Livers of the SPF mice. The squares indicate hierarchical clusters.  $*P < 0.05$ ,  $**P < 0.01$ ,  $***P < 0.001$ .



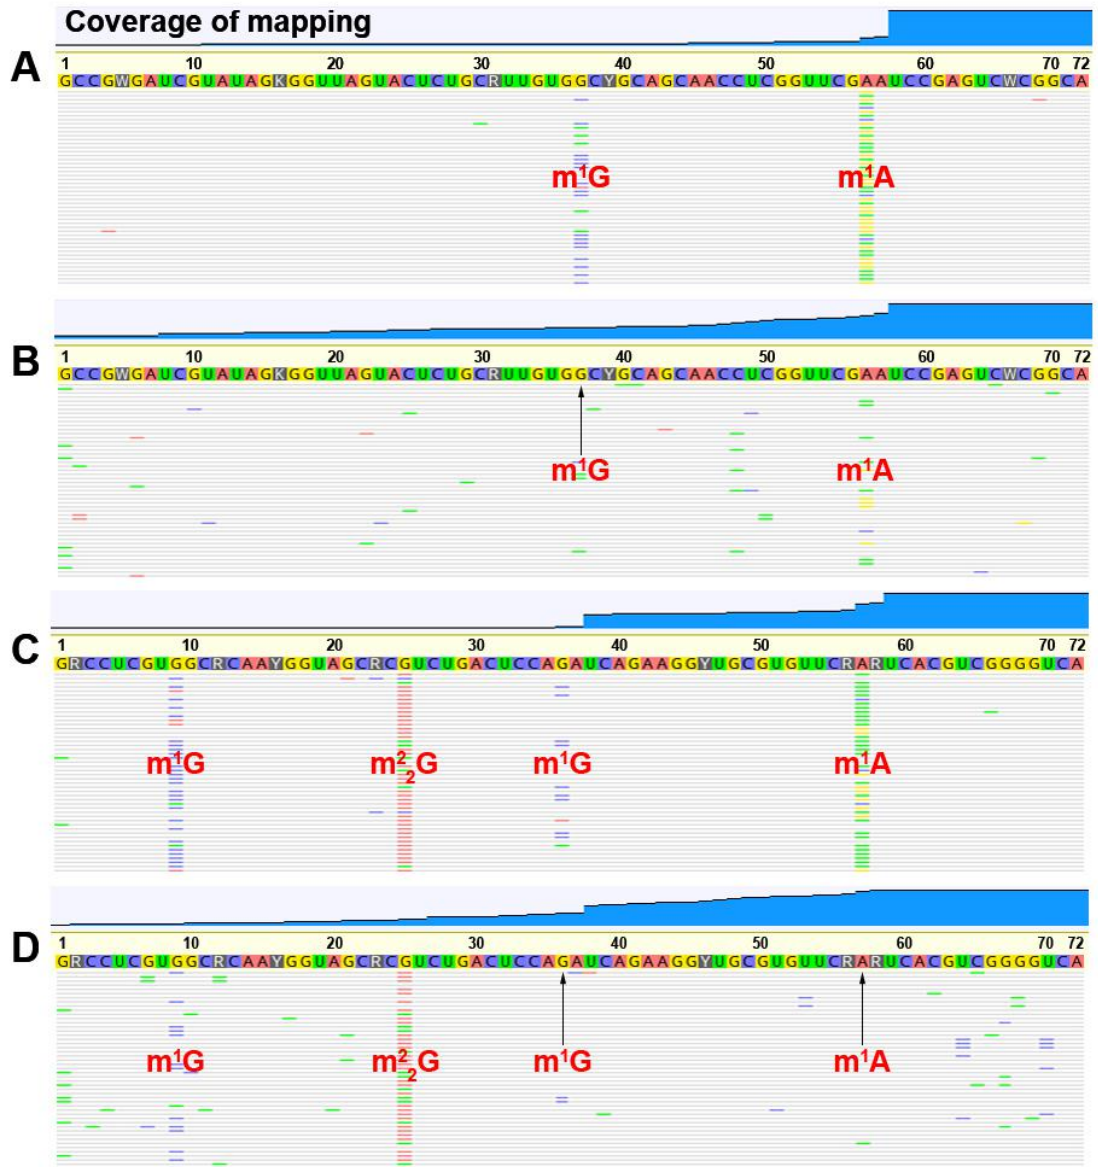

**Figure S5.** Mapping alignments of two cytosolic amino acid isotypes (tRNA<sup>His</sup> and tRNA<sup>Phe</sup>) in the brains. The data are from the -DM or +DM libraries ( $n = 6$ , combining the data of GF and SPF mice), respectively. (A) tRNA<sup>His</sup> in the -DM libraries. (B) tRNA<sup>His</sup> in the +DM libraries. (C) tRNA<sup>Phe</sup> in the -DM libraries. (D) tRNA<sup>Phe</sup> in the +DM libraries. m<sup>1</sup>G: *N*<sup>1</sup>-methylguanosine; m<sup>1</sup>A: *N*<sup>1</sup>-methyladenosine; m<sup>2</sup>G: *N*<sup>2</sup>,*N*<sup>2</sup>-dimethylguanosine.

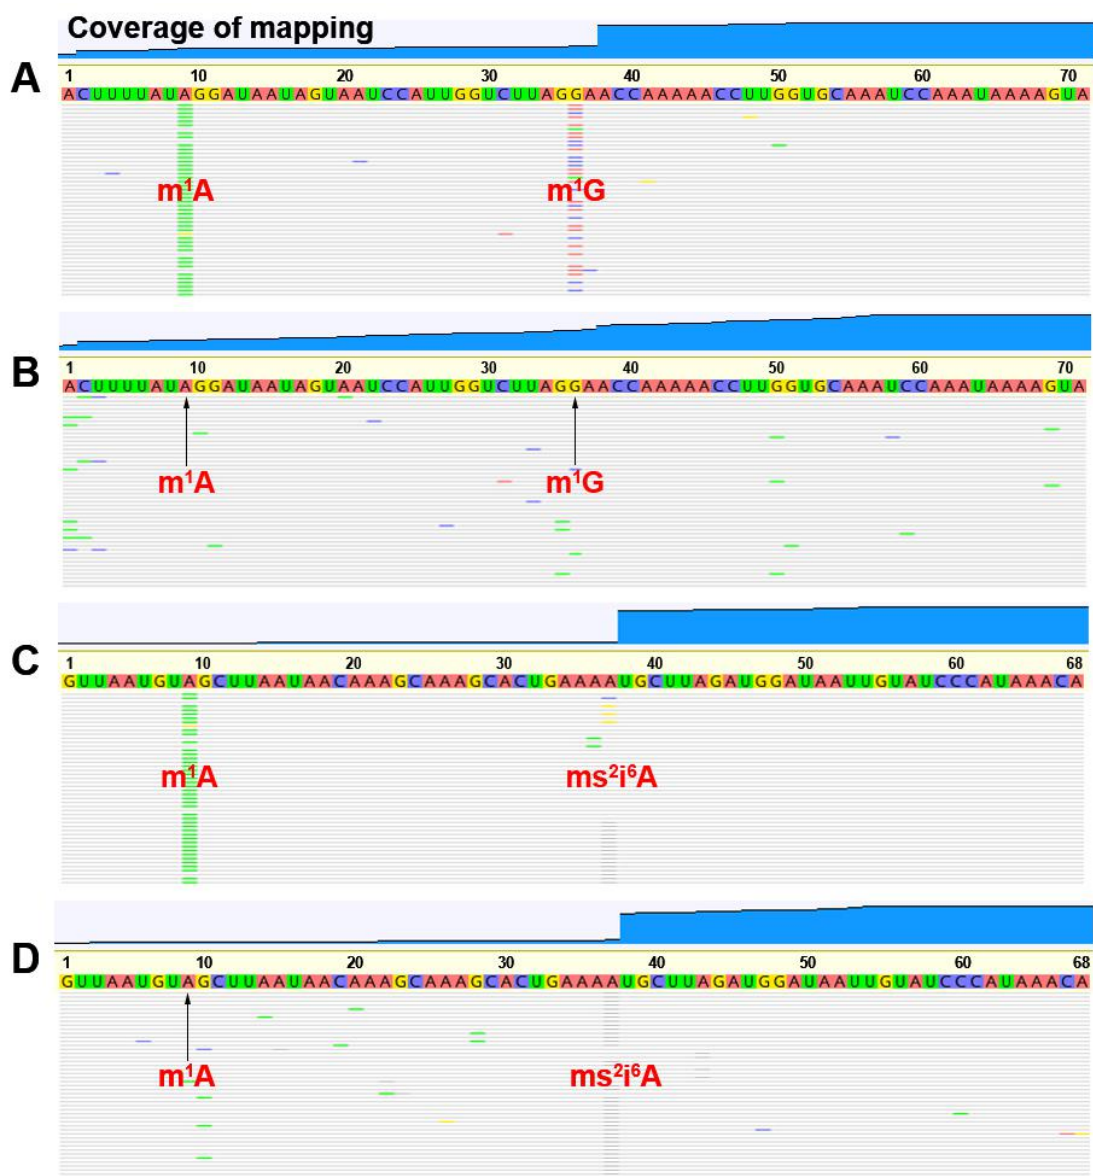

**Figure S6.** Mapping alignments of two mitochondrial isoacceptors (tRNA<sup>Leu-UAG</sup> and tRNA<sup>Phe</sup>) in the brains. The data are from the -DM or +DM libraries ( $n = 6$ , combining the data of GF and SPF mice), respectively. (A) tRNA<sup>Leu-UAG</sup> in the -DM libraries. (B) tRNA<sup>Leu-UAG</sup> in the +DM libraries. (C) tRNA<sup>Phe</sup> in the -DM libraries. (D) tRNA<sup>Phe</sup> in the +DM libraries. ms<sup>2</sup>i<sup>6</sup>A: 2-methylthio-*N*<sup>6</sup>-isopentenyladenosine.

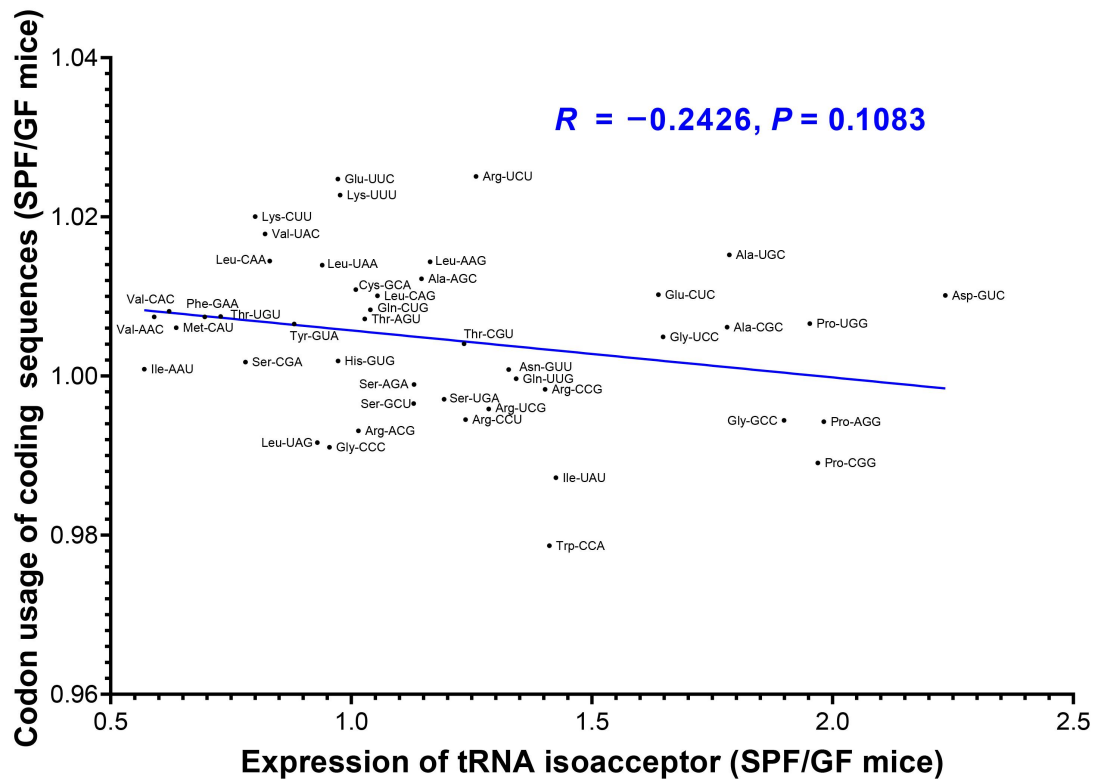

**Figure S7.** Correlation plot between the mammalian anticodons and codons. The anticodons are from 45 tRNA isoacceptors based on the FPKM values and the codons are from codon usage of 15,901 coding sequences (CDSs) in the livers ( $n = 3$ , SPF/GF mice) from the  $-DM$  libraries. The dots represent tRNA isoacceptor types.
